# Supplementary material for: Accuracy of the Urinalysis for Urinary Tract Infections in Febrile Infants 60 Days and Younger
Source: Oxford University Press journal article supplement (doi:10.1542/peds.2017-3068), 2018-01-16
Supplement: peds_20173068supplementarydata.pdf [file peds_20173068supplementarydata.pdf]

## Supplemental Information

**SUPPLEMENTAL TABLE 5** Urinalysis Results Based on UTI Defined as  $\geq 10\,000$  CFUs/mL, Stratified by Bacteremia Status

|                                   | UTI With Bacteremia,<br><i>N</i> = 30 | UTI Without Bacteremia,<br><i>N</i> = 365 | <i>P</i> | UTI (Regardless of Bacteremia),<br><i>N</i> = 395 | No UTI,<br><i>N</i> = 3830 | <i>P</i> |
|-----------------------------------|---------------------------------------|-------------------------------------------|----------|---------------------------------------------------|----------------------------|----------|
| LE concentration, <i>n</i> = 4225 |                                       |                                           | .01      |                                                   |                            | <.001    |
| Small (trace or 1+)               | 0 (0.0)                               | 36 (9.9)                                  |          | 36 (9.1)                                          | 91 (2.4)                   |          |
| Moderate (2+)                     | 6 (20.0)                              | 69 (18.9)                                 |          | 75 (18.9)                                         | 36 (0.9)                   |          |
| Large (3+)                        | 24 (80.0)                             | 202 (55.3)                                |          | 226 (57.1)                                        | 31 (0.8)                   |          |
| Negative results                  | 0 (0.0)                               | 58 (15.9)                                 |          | 58 (14.7)                                         | 3672 (95.9)                |          |
| Nitrites, <i>n</i> = 4225         |                                       |                                           | .4       |                                                   |                            | <.001    |
| Positive                          | 11 (36.7)                             | 109 (29.9)                                |          | 120 (30.4)                                        | 19 (0.5)                   |          |
| Negative                          | 19 (63.3)                             | 256 (70.1)                                |          | 275 (69.6)                                        | 3811 (99.5)                |          |
| Pyuria, <i>n</i> = 4176           |                                       |                                           | .4       |                                                   |                            | <.001    |
| Positive (>5 WBCs/HPF)            | 19 (79.2)                             | 246 (71.7)                                |          | 265 (72.2)                                        | 243 (6.4)                  |          |
| Negative ( $\leq 5$ WBCs/HPF)     | 5 (20.8)                              | 97 (28.3)                                 |          | 102 (27.8)                                        | 3566 (93.6)                |          |

All data presented as *n* (%).

**SUPPLEMENTAL TABLE 6** Test Characteristics of Aggregate Urinalysis for Diagnosing UTI Defined as  $\geq 10,000$  CFUs/mL, Stratified by Bacteremia Status

|                                                                       | Sensitivity (95% CI) | Specificity (95% CI) | PPV (95% CI)     | NPV (95% CI)     | LR+ (95% CI)        | LR- (95% CI)      |
|-----------------------------------------------------------------------|----------------------|----------------------|------------------|------------------|---------------------|-------------------|
| <b>Identification of any UTI<sup>a</sup> (N = 395)</b>                |                      |                      |                  |                  |                     |                   |
| Entire population, n = 4225                                           | 0.87 (0.83–0.90)     | 0.91 (0.90–0.92)     | 0.49 (0.46–0.53) | 0.99 (0.98–0.99) | 9.45 (8.50–10.51)   | 0.14 (0.11–0.18)  |
| Infants $\leq 28$ d, n = 1325                                         | 0.88 (0.82–0.92)     | 0.90 (0.88–0.92)     | 0.55 (0.49–0.61) | 0.98 (0.97–0.99) | 8.71 (7.27–10.44)   | 0.14 (0.09–0.21)  |
| Infants 29–60 d, n = 2900                                             | 0.87 (0.82–0.91)     | 0.91 (0.90–0.92)     | 0.46 (0.41–0.51) | 0.99 (0.98–0.99) | 9.79 (8.58–11.18)   | 0.15 (0.11–0.20)  |
| <b>Identification of UTI with bacteremia<sup>a</sup> (N = 30)</b>     |                      |                      |                  |                  |                     |                   |
| Entire population, n = 3860                                           | 1.00 (0.88–1.00)     | 0.91 (0.90–0.92)     | 0.08 (0.05–0.11) | 1.00 (1.00–1.00) | 10.85 (9.82–11.98)  | 0.00 <sup>b</sup> |
| Infants $\leq 28$ d, n = 1177                                         | 1.00 (0.78–1.00)     | 0.90 (0.88–0.92)     | 0.11 (0.07–0.18) | 1.00 (1.00–1.00) | 9.93 (8.36–11.79)   | 0.00 <sup>b</sup> |
| Infants 29–60 d, n = 2683                                             | 1.00 (0.78–1.00)     | 0.91 (0.90–0.92)     | 0.06 (0.03–0.10) | 1.00 (1.00–1.00) | 11.31 (10.01–12.77) | 0.00 <sup>b</sup> |
| <b>Identification of UTI without bacteremia<sup>a</sup> (N = 365)</b> |                      |                      |                  |                  |                     |                   |
| Entire population, n = 4195                                           | 0.86 (0.82–0.89)     | 0.91 (0.90–0.92)     | 0.47 (0.43–0.51) | 0.99 (0.98–0.99) | 9.33 (8.38–10.39)   | 0.15 (0.12–0.20)  |
| Infants $\leq 28$ d, n = 1310                                         | 0.86 (0.80–0.92)     | 0.90 (0.88–0.92)     | 0.52 (0.46–0.59) | 0.98 (0.97–0.99) | 8.59 (7.15–10.32)   | 0.15 (0.10–0.23)  |
| Infants 29–60 d, n = 2885                                             | 0.86 (0.80–0.90)     | 0.91 (0.90–0.92)     | 0.44 (0.39–0.49) | 0.99 (0.98–0.99) | 9.69 (8.48–11.07)   | 0.16 (0.11–0.22)  |

LR+, positive likelihood ratio; LR-, negative likelihood ratio; NPV, negative predictive value; PPV, positive predictive value.

<sup>a</sup> Positive urinalysis results were defined as the presence of any LE or nitrite or pyuria.

<sup>b</sup> LR- does not have a CI because of a sensitivity of 1.00.

**SUPPLEMENTAL TABLE 7** Urinalysis Results Based on Varying Ranges of CFU Levels, Stratified by Bacteremia Status

|                                                         | Cath. 10 000–99 999 CFUs |                            | Cath. $\geq$ 100 000 CFUs |                             |
|---------------------------------------------------------|--------------------------|----------------------------|---------------------------|-----------------------------|
|                                                         | With Bacteremia, N = 2   | Without Bacteremia, N = 48 | With Bacteremia, N = 26   | Without Bacteremia, N = 236 |
| LE concentration, n = 312                               | 2                        | 48                         | 26                        | 236                         |
| Small (trace or 1+)                                     | 0 (0.0)                  | 7 (14.6)                   | 0 (0.0)                   | 23 (9.7)                    |
| Moderate (2+)                                           | 1 (50.0)                 | 8 (16.7)                   | 5 (19.2)                  | 45 (19.1)                   |
| Large (3+)                                              | 1 (50.0)                 | 12 (25.0)                  | 21 (80.8)                 | 148 (62.7)                  |
| Negative results                                        | 0 (0.0)                  | 21 (43.8)                  | 0 (0.0)                   | 20 (8.5)                    |
| Nitrites, n = 312                                       | 2                        | 48                         | 26                        | 236                         |
| Positive                                                | 0 (0.0)                  | 2 (4.2)                    | 11 (42.3)                 | 94 (39.8)                   |
| Negative                                                | 2 (100.0)                | 46 (95.8)                  | 15 (57.7)                 | 142 (60.2)                  |
| Pyuria, n = 286                                         | 1                        | 47                         | 21                        | 217                         |
| Positive (>5 WBCs/HPF)                                  | 0 (0.0)                  | 18 (38.3)                  | 17 (81.0)                 | 180 (82.9)                  |
| Negative ( $\leq$ 5 WBCs/HPF)                           | 1 (100.0)                | 29 (61.7)                  | 4 (19.0)                  | 37 (17.1)                   |
| Aggregate urinalysis (LE or nitrite or pyuria), n = 312 | 2                        | 48                         | 26                        | 236                         |
| Positive                                                | 2 (100.0)                | 28 (58.3)                  | 26 (100.0)                | 222 (94.1)                  |
| Negative                                                | 0 (0.0)                  | 20 (41.7)                  | 0 (0.0)                   | 14 (5.9)                    |

All data presented as n (%). Cath., catheterized sample of.

**SUPPLEMENTAL TABLE 8** Sensitivities for UTIs Defined as  $\geq 50,000$  CFUs/mL by Bacteremia Status and Pathogen

| N                                                      | With Bacteremia (95% CI) |                   |                     |                     | Without Bacteremia (95% CI) |                   |                     |                     |
|--------------------------------------------------------|--------------------------|-------------------|---------------------|---------------------|-----------------------------|-------------------|---------------------|---------------------|
|                                                        | <i>E coli</i>            | <i>Klebsiella</i> | <i>Enterobacter</i> | <i>Enterococcus</i> | <i>E coli</i>               | <i>Klebsiella</i> | <i>Enterobacter</i> | <i>Enterococcus</i> |
| Individual urinalysis components                       | 23                       | 1                 | 3                   | 0                   | 214                         | 12                | 5                   | 9                   |
| Any LE, <i>n</i> = 4115                                | 1.00 (0.85–1.00)         | 1.00 (0.03–1.00)  | 1.00 (0.29–1.00)    | NA                  | 0.95 (0.92–0.98)            | 0.83 (0.52–0.98)  | 0.80 (0.28–0.99)    | 0.44 (0.14–0.79)    |
| Nitrites, <i>n</i> = 4115                              | 0.39 (0.20–0.61)         | 1.00 (0.03–1.00)  | 0.33 (0.01–0.91)    | NA                  | 0.41 (0.34–0.48)            | 0.17 (0.02–0.48)  | 0.20 (0.01–0.72)    | 0.22 (0.03–0.60)    |
| Pyuria, $>5$ WBCs/HPF, <i>n</i> = 4070                 | 0.78 (0.52–0.94)         | 1.00 (0.03–1.00)  | 0.67 (0.09–0.99)    | NA                  | 0.87 (0.82–0.92)            | 0.50 (0.21–0.79)  | 1.00 (0.48–1.00)    | 0.22 (0.03–0.60)    |
| Aggregate urinalysis components                        |                          |                   |                     |                     |                             |                   |                     |                     |
| Positive for LE or nitrites or pyuria, <i>n</i> = 4115 | 1.00 (0.85–1.00)         | 1.00 (0.03–1.00)  | 1.00 (0.29–1.00)    | NA                  | 0.97 (0.94–0.99)            | 0.83 (0.52–0.98)  | 1.00 (0.48–1.00)    | 0.56 (0.21–0.86)    |
| Infants $\leq 28$ d, <i>n</i> = 1289                   | 1.00 (0.74–1.00)         | 1.00 (0.03–1.00)  | 1.00 (0.03–1.00)    | NA                  | 0.98 (0.93–1.00)            | 1.00 (0.40–1.00)  | 1.00 (0.29–1.00)    | 0.67 (0.09–0.99)    |
| Infants 29–60 d, <i>n</i> = 2826                       | 1.00 (0.72–1.00)         | NA                | 1.00 (0.16–1.00)    | NA                  | 0.97 (0.91–0.99)            | 0.75 (0.35–0.97)  | 1.00 (0.16–1.00)    | 0.50 (0.12–0.88)    |

NA, not applicable (there were no positive UTIs that met these criteria).
